# Supplementary material
Source: publisher figshare collection journal article supplement (https://gsajournals.figshare.com/ndownloader/files/27742050)
Supplement: Supplementary file 1 [file 27742050]

## Sheet: GO
SECRETOME - M. humberi ESALQ1638
MHUMG1_ene name	Go assigned
MHUMG1_10239	GO:0051213;GO:0055114
MHUMG1_9740	GO:0051213;GO:0055114
MHUMG1_8499	GO:0044550
MHUMG1_5772	GO:0033961
MHUMG1_1051	GO:0030246
MHUMG1_9641	GO:0016972;GO:0055114
MHUMG1_787	GO:0016884
MHUMG1_4652	GO:0016829;GO:0046872
MHUMG1_8445	GO:0016829
MHUMG1_9291	GO:0016829
MHUMG1_10361	GO:0016788
MHUMG1_3336	GO:0016788
MHUMG1_4922	GO:0016788
MHUMG1_8840	GO:0016788
MHUMG1_932	GO:0016788
MHUMG1_9558	GO:0016788
MHUMG1_3150	GO:0016787;GO:0016829
MHUMG1_5875	GO:0016787;GO:0016829
MHUMG1_1112	GO:0016787
MHUMG1_1438	GO:0016787
MHUMG1_2159	GO:0016787
MHUMG1_3997	GO:0016787
MHUMG1_4279	GO:0016787
MHUMG1_4473	GO:0016787
MHUMG1_4624	GO:0016787
MHUMG1_4693	GO:0016787
MHUMG1_5007	GO:0016787
MHUMG1_5224	GO:0016787
MHUMG1_5504	GO:0016787
MHUMG1_5709	GO:0016787
MHUMG1_5716	GO:0016787
MHUMG1_7088	GO:0016787
MHUMG1_7288	GO:0016787
MHUMG1_7307	GO:0016787
MHUMG1_7331	GO:0016787
MHUMG1_7354	GO:0016787
MHUMG1_7440	GO:0016787
MHUMG1_7789	GO:0016787
MHUMG1_7972	GO:0016787
MHUMG1_8152	GO:0016787
MHUMG1_8583	GO:0016787
MHUMG1_8757	GO:0016787
MHUMG1_8776	GO:0016787
MHUMG1_9154	GO:0016787
MHUMG1_9241	GO:0016787
MHUMG1_9503	GO:0016787
MHUMG1_9741	GO:0016787
MHUMG1_9769	GO:0016787
MHUMG1_9831	GO:0016787
MHUMG1_9994	GO:0016787
MHUMG1_6670	GO:0016740;GO:0016884
MHUMG1_9954	GO:0016740;GO:0016884
MHUMG1_1323	GO:0016740
MHUMG1_4616	GO:0016740
MHUMG1_8624	GO:0016740
MHUMG1_10180	GO:0016614;GO:0050660;GO:0055114
MHUMG1_10220	GO:0016614;GO:0050660;GO:0055114
MHUMG1_2014	GO:0016614;GO:0050660;GO:0055114
MHUMG1_3732	GO:0016614;GO:0050660;GO:0055114
MHUMG1_4557	GO:0016614;GO:0050660;GO:0055114
MHUMG1_4635	GO:0016614;GO:0050660;GO:0055114
MHUMG1_5823	GO:0016614;GO:0050660;GO:0055114
MHUMG1_7617	GO:0016614;GO:0050660;GO:0055114
MHUMG1_7944	GO:0016614;GO:0050660;GO:0055114
MHUMG1_8322	GO:0016614;GO:0050660;GO:0055114
MHUMG1_9108	GO:0016614;GO:0050660;GO:0055114
MHUMG1_9278	GO:0016614;GO:0050660;GO:0055114
MHUMG1_9948	GO:0016614;GO:0050660;GO:0055114
MHUMG1_2565	GO:0016491;GO:0055114
MHUMG1_2919	GO:0016491;GO:0055114
MHUMG1_5832	GO:0016491;GO:0055114
MHUMG1_9182	GO:0016491;GO:0055114
MHUMG1_974	GO:0016491;GO:0055114
MHUMG1_582	GO:0016491;GO:0046872;GO:0055114
MHUMG1_9439	GO:0016491;GO:0046872;GO:0055114
MHUMG1_9470	GO:0016491;GO:0019748;GO:0055114
MHUMG1_860	GO:0016301;GO:0016310
MHUMG1_1378	GO:0016021;GO:0022891;GO:0055085
MHUMG1_9289	GO:0016021;GO:0016884
MHUMG1_4068	GO:0016021;GO:0016787
MHUMG1_7394	GO:0016021;GO:0016787
MHUMG1_8496	GO:0016021;GO:0016787
MHUMG1_8315	GO:0016021;GO:0016746
MHUMG1_9993	GO:0016021;GO:0016740
MHUMG1_10073	GO:0016021
MHUMG1_1567	GO:0016021
MHUMG1_1871	GO:0016021
MHUMG1_2174	GO:0016021
MHUMG1_2366	GO:0016021
MHUMG1_301	GO:0016021
MHUMG1_5042	GO:0016021
MHUMG1_5717	GO:0016021
MHUMG1_5908	GO:0016021
MHUMG1_6783	GO:0016021
MHUMG1_7810	GO:0016021
MHUMG1_8276	GO:0016021
MHUMG1_8340	GO:0016021
MHUMG1_8404	GO:0016021
MHUMG1_892	GO:0016021
MHUMG1_9540	GO:0016021
MHUMG1_9842	GO:0016021
MHUMG1_5173	GO:0016020;GO:0016740
MHUMG1_10009	GO:0016020;GO:0016614;GO:0050660;GO:0055114
MHUMG1_153	GO:0016020;GO:0016301;GO:0034613;GO:0044444;GO:0046854;GO:0048015
MHUMG1_3994	GO:0016020
MHUMG1_8225	GO:0016020
MHUMG1_7069	GO:0010181;GO:0016491;GO:0055114
MHUMG1_5460	GO:0009166;GO:0016787
MHUMG1_243	GO:0008830;GO:0009117;GO:0019872;GO:0030639;GO:0033609;GO:0045735
MHUMG1_2838	GO:0008496;GO:0016021;GO:0016052
MHUMG1_9734	GO:0008496;GO:0016021;GO:0016052
MHUMG1_8385	GO:0008430
MHUMG1_1945	GO:0008422;GO:0030245;GO:0102483
MHUMG1_5894	GO:0008422;GO:0030245;GO:0102483
MHUMG1_10124	GO:0008270;GO:0016491;GO:0055114
MHUMG1_9620	GO:0008236
MHUMG1_4493	GO:0008233
MHUMG1_2650	GO:0008168;GO:0016070;GO:0032259
MHUMG1_10154	GO:0008152;GO:0016798
MHUMG1_5018	GO:0008152;GO:0016798
MHUMG1_5675	GO:0008152;GO:0016798
MHUMG1_6751	GO:0008152;GO:0016788
MHUMG1_5651	GO:0008152;GO:0016787
MHUMG1_2651	GO:0008152;GO:0016740
MHUMG1_5841	GO:0008080;GO:0042967
MHUMG1_2678	GO:0006807;GO:0016813;GO:0046872
MHUMG1_5703	GO:0006807;GO:0016810
MHUMG1_9977	GO:0006807;GO:0008061;GO:0016798;GO:0016810;GO:0045493
MHUMG1_6481	GO:0006801;GO:0046872;GO:0055114
MHUMG1_7483	GO:0006801;GO:0046872;GO:0055114
MHUMG1_897	GO:0006725;GO:0008199;GO:0016702;GO:0055114
MHUMG1_2899	GO:0006725;GO:0008199;GO:0016021;GO:0016702;GO:0055114
MHUMG1_3144	GO:0006629;GO:0016787
MHUMG1_3508	GO:0006629;GO:0016787
MHUMG1_3947	GO:0006629;GO:0016787
MHUMG1_6605	GO:0006629;GO:0016787
MHUMG1_7805	GO:0006629;GO:0016787
MHUMG1_9522	GO:0006629;GO:0008081;GO:0016021
MHUMG1_1759	GO:0006629;GO:0008081
MHUMG1_2643	GO:0006629;GO:0008081
MHUMG1_3162	GO:0006629;GO:0008081
MHUMG1_4475	GO:0006629;GO:0008081
MHUMG1_5501	GO:0006629;GO:0008081
MHUMG1_6105	GO:0006629;GO:0008081
MHUMG1_9666	GO:0006582;GO:0016740;GO:0016884;GO:0030411
MHUMG1_7298	GO:0006508;GO:0008237;GO:0052051
MHUMG1_9593	GO:0006508;GO:0008237;GO:0052051
MHUMG1_9633	GO:0006508;GO:0008237;GO:0044464
MHUMG1_246	GO:0006508;GO:0008237;GO:0016020
MHUMG1_34	GO:0006508;GO:0008237
MHUMG1_10300	GO:0006508;GO:0008237
MHUMG1_5738	GO:0006508;GO:0008237
MHUMG1_5871	GO:0006508;GO:0008237
MHUMG1_9357	GO:0006508;GO:0008237
MHUMG1_10532	GO:0006508;GO:0008236
MHUMG1_5719	GO:0006508;GO:0008236
MHUMG1_5976	GO:0006508;GO:0008236
MHUMG1_7510	GO:0006508;GO:0008236
MHUMG1_9144	GO:0006508;GO:0008236
MHUMG1_6943	GO:0006508;GO:0008233;GO:0046872
MHUMG1_7939	GO:0006508;GO:0008233
MHUMG1_3763	GO:0006144;GO:0033971
MHUMG1_1704	GO:0006118;GO:0009055
MHUMG1_8797	GO:0006098;GO:0046562;GO:0050660;GO:0055114
MHUMG1_1468	GO:0005975;GO:0016798;GO:0030246
MHUMG1_3892	GO:0005975;GO:0016798;GO:0030246
MHUMG1_8968	GO:0005975;GO:0016798
MHUMG1_10013	GO:0005975;GO:0016787;GO:0030246
MHUMG1_8768	GO:0005975;GO:0016787;GO:0030246
MHUMG1_9247	GO:0005975;GO:0016787;GO:0030246
MHUMG1_7535	GO:0005975;GO:0016787;GO:0016853;GO:0030246
MHUMG1_1846	GO:0005975;GO:0016787
MHUMG1_8061	GO:0005975;GO:0016787
MHUMG1_9354	GO:0005975;GO:0016787
MHUMG1_1899	GO:0005975;GO:0016021;GO:0016787
MHUMG1_5063	GO:0005975
MHUMG1_643	GO:0005975
MHUMG1_2356	GO:0005886;GO:0005975;GO:0009277;GO:0016740;GO:0016787;GO:0031225
MHUMG1_2846	GO:0005886;GO:0005975;GO:0009277;GO:0016021;GO:0016787;GO:0031225;GO:0042124
MHUMG1_5076	GO:0005840;GO:0016020
MHUMG1_8736	GO:0005840
MHUMG1_7135	GO:0005829;GO:0042147
MHUMG1_2832	GO:0005829;GO:0009277;GO:0009986;GO:0035556
MHUMG1_1206	GO:0005787;GO:0006465;GO:0008233;GO:0016021;GO:0045047
MHUMG1_4393	GO:0005783;GO:0006629;GO:0006914;GO:0016787;GO:0030397
MHUMG1_2667	GO:0005741;GO:0016301;GO:0016310
MHUMG1_4206	GO:0005739;GO:0009277
MHUMG1_7832	GO:0005634;GO:0005829;GO:0019988;GO:0043399
MHUMG1_939	GO:0005634;GO:0005768;GO:0005829;GO:0006886;GO:0008565;GO:0030906;GO:0042147
MHUMG1_7174	GO:0005576;GO:0016998;GO:0030600
MHUMG1_7335	GO:0005576;GO:0016853;GO:0030145;GO:0045735
MHUMG1_8532	GO:0005576;GO:0009405;GO:0016740
MHUMG1_4417	GO:0005576;GO:0009405
MHUMG1_7194	GO:0005576;GO:0009405
MHUMG1_1869	GO:0005576;GO:0005975;GO:0016837;GO:0030246
MHUMG1_1139	GO:0005576
MHUMG1_5204	GO:0005576
MHUMG1_9355	GO:0005576
MHUMG1_3115	GO:0005507;GO:0016491;GO:0055114
MHUMG1_8552	GO:0005507;GO:0016491;GO:0055114
MHUMG1_9662	GO:0005507;GO:0016491;GO:0055114
MHUMG1_9865	GO:0005507;GO:0016491;GO:0055114
MHUMG1_9881	GO:0005507;GO:0016491;GO:0055114
MHUMG1_9904	GO:0005507;GO:0016491;GO:0055114
MHUMG1_3550	GO:0005507;GO:0016020;GO:0016491;GO:0055114
MHUMG1_4897	GO:0005507;GO:0008131;GO:0009308;GO:0048038;GO:0055114
MHUMG1_8785	GO:0005488
MHUMG1_1080	GO:0005199;GO:0009277;GO:0042546
MHUMG1_7441	GO:0005199;GO:0009277;GO:0042546
MHUMG1_2787	GO:0005199;GO:0009277;GO:0031505;GO:0042546
MHUMG1_723	GO:0005199;GO:0005618;GO:0016020;GO:0042546
MHUMG1_10175	GO:0004806;GO:0016042;GO:0046486
MHUMG1_1180	GO:0004806;GO:0016042;GO:0046486
MHUMG1_3662	GO:0004806;GO:0016042;GO:0046486
MHUMG1_3916	GO:0004806;GO:0016042;GO:0046486
MHUMG1_4430	GO:0004806;GO:0016042;GO:0046486
MHUMG1_9335	GO:0004806;GO:0016042;GO:0046486
MHUMG1_9399	GO:0004806;GO:0016042;GO:0046486
MHUMG1_1266	GO:0004806;GO:0016021;GO:0016042;GO:0022857;GO:0046486;GO:0055085
MHUMG1_7796	GO:0004767;GO:0006685;GO:0006687;GO:0016798
MHUMG1_8981	GO:0004767;GO:0006685;GO:0006687;GO:0016798
MHUMG1_7138	GO:0004672;GO:0005524;GO:0006468
MHUMG1_1333	GO:0004668;GO:0005509;GO:0005737;GO:0006807;GO:0018101
MHUMG1_2897	GO:0004668;GO:0005509;GO:0005737;GO:0006807;GO:0018101
MHUMG1_3136	GO:0004650;GO:0005982;GO:0005985;GO:0016829
MHUMG1_8782	GO:0004622;GO:0009395
MHUMG1_7047	GO:0004601;GO:0006804;GO:0006979;GO:0020037;GO:0055114;GO:0098869
MHUMG1_3972	GO:0004601;GO:0006804;GO:0006979;GO:0020037;GO:0046872;GO:0055114;GO:0098869
MHUMG1_10370	GO:0004571;GO:0005509;GO:0005975;GO:0016020
MHUMG1_663	GO:0004571;GO:0005509;GO:0005975;GO:0016020
MHUMG1_1072	GO:0004568;GO:0005975;GO:0006032;GO:0016998
MHUMG1_7206	GO:0004568;GO:0005975;GO:0006032;GO:0016998
MHUMG1_8245	GO:0004568;GO:0005975;GO:0006032;GO:0016998
MHUMG1_8602	GO:0004568;GO:0005975;GO:0006032;GO:0016998
MHUMG1_4112	GO:0004565;GO:0006012;GO:0006027;GO:0006687;GO:0009341;GO:0046486
MHUMG1_4579	GO:0004565;GO:0006012;GO:0006027;GO:0006687;GO:0009341;GO:0046486
MHUMG1_5289	GO:0004560;GO:0006004
MHUMG1_7308	GO:0004555;GO:0005982;GO:0005985;GO:0005991
MHUMG1_3844	GO:0004553;GO:0030246;GO:0045493
MHUMG1_2916	GO:0004553;GO:0016052;GO:0030246
MHUMG1_2107	GO:0004553;GO:0005975;GO:0030246
MHUMG1_5790	GO:0004553;GO:0005975;GO:0030246
MHUMG1_8387	GO:0004553;GO:0005975;GO:0030246
MHUMG1_10132	GO:0004553;GO:0005975
MHUMG1_1101	GO:0004553;GO:0005975
MHUMG1_1864	GO:0004553;GO:0005975
MHUMG1_2531	GO:0004553;GO:0005975
MHUMG1_2617	GO:0004553;GO:0005975
MHUMG1_5388	GO:0004553;GO:0005975
MHUMG1_557	GO:0004553;GO:0005975
MHUMG1_6954	GO:0004553;GO:0005975
MHUMG1_7983	GO:0004553;GO:0005975
MHUMG1_8542	GO:0004553;GO:0005975
MHUMG1_9316	GO:0004553;GO:0005975
MHUMG1_9891	GO:0004553;GO:0005975
MHUMG1_1896	GO:0004553;GO:0005618;GO:0005975;GO:0016740;GO:0071555
MHUMG1_2534	GO:0004553;GO:0005576;GO:0005975;GO:0030248
MHUMG1_1031	GO:0004553;GO:0005576;GO:0005975;GO:0006508;GO:0008237;GO:0030248
MHUMG1_8616	GO:0004553;GO:0005576;GO:0005975;GO:0006508;GO:0008237;GO:0030248
MHUMG1_533	GO:0004519;GO:0004527;GO:0016021;GO:0090305
MHUMG1_10546	GO:0004497;GO:0055114;GO:0071949
MHUMG1_278	GO:0004497;GO:0055114;GO:0071949
MHUMG1_9457	GO:0004497;GO:0055114;GO:0071949
MHUMG1_10581	GO:0004497;GO:0055114
MHUMG1_10475	GO:0004497;GO:0005506;GO:0016705;GO:0020037;GO:0055114
MHUMG1_4002	GO:0004435;GO:0005622;GO:0007242;GO:0009395;GO:0035556;GO:0046339
MHUMG1_4800	GO:0004415;GO:0005975
MHUMG1_45	GO:0004252;GO:0006508
MHUMG1_10028	GO:0004252;GO:0006508
MHUMG1_10042	GO:0004252;GO:0006508
MHUMG1_10121	GO:0004252;GO:0006508
MHUMG1_10183	GO:0004252;GO:0006508
MHUMG1_10404	GO:0004252;GO:0006508
MHUMG1_10482	GO:0004252;GO:0006508
MHUMG1_10621	GO:0004252;GO:0006508
MHUMG1_1067	GO:0004252;GO:0006508
MHUMG1_1882	GO:0004252;GO:0006508
MHUMG1_2670	GO:0004252;GO:0006508
MHUMG1_3098	GO:0004252;GO:0006508
MHUMG1_3325	GO:0004252;GO:0006508
MHUMG1_3586	GO:0004252;GO:0006508
MHUMG1_5773	GO:0004252;GO:0006508
MHUMG1_5809	GO:0004252;GO:0006508
MHUMG1_5860	GO:0004252;GO:0006508
MHUMG1_7066	GO:0004252;GO:0006508
MHUMG1_7333	GO:0004252;GO:0006508
MHUMG1_7392	GO:0004252;GO:0006508
MHUMG1_7393	GO:0004252;GO:0006508
MHUMG1_7422	GO:0004252;GO:0006508
MHUMG1_7576	GO:0004252;GO:0006508
MHUMG1_7604	GO:0004252;GO:0006508
MHUMG1_7920	GO:0004252;GO:0006508
MHUMG1_7946	GO:0004252;GO:0006508
MHUMG1_7964	GO:0004252;GO:0006508
MHUMG1_8256	GO:0004252;GO:0006508
MHUMG1_8262	GO:0004252;GO:0006508
MHUMG1_8325	GO:0004252;GO:0006508
MHUMG1_8965	GO:0004252;GO:0006508
MHUMG1_9440	GO:0004252;GO:0006508
MHUMG1_9504	GO:0004252;GO:0006508
MHUMG1_9686	GO:0004252;GO:0006508
MHUMG1_9778	GO:0004252;GO:0006508
MHUMG1_9863	GO:0004252;GO:0006508
MHUMG1_9882	GO:0004252;GO:0006508
MHUMG1_9974	GO:0004252;GO:0006508
MHUMG1_78	GO:0004252;GO:0005618;GO:0006508;GO:0016020
MHUMG1_10179	GO:0004252;GO:0005618;GO:0006508;GO:0016020
MHUMG1_2137	GO:0004252;GO:0005618;GO:0006508;GO:0016020
MHUMG1_3489	GO:0004252;GO:0005618;GO:0006508;GO:0016020
MHUMG1_4477	GO:0004252;GO:0005618;GO:0006508;GO:0016020
MHUMG1_7521	GO:0004252;GO:0005618;GO:0006508;GO:0016020
MHUMG1_8793	GO:0004252;GO:0005618;GO:0006508;GO:0016020
MHUMG1_1713	GO:0004252;GO:0005576;GO:0006508
MHUMG1_2023	GO:0004252;GO:0005576;GO:0006508
MHUMG1_8282	GO:0004252;GO:0005576;GO:0006508
MHUMG1_9017	GO:0004252;GO:0005576;GO:0006508
MHUMG1_9295	GO:0004252;GO:0005576;GO:0006508
MHUMG1_8877	GO:0004252;GO:0004668;GO:0005509;GO:0005737;GO:0006508;GO:0006807;GO:0018101
MHUMG1_10	GO:0004252;GO:0004568;GO:0005975;GO:0006032;GO:0006508;GO:0008061;GO:0016998
MHUMG1_9138	GO:0004252;GO:0004413;GO:0005524;GO:0006508;GO:0006544;GO:0006563;GO:0006566;GO:0016310;GO:0016829
MHUMG1_10143	GO:0004222;GO:0006508
MHUMG1_9668	GO:0004222;GO:0006508
MHUMG1_9826	GO:0004222;GO:0006508
MHUMG1_724	GO:0004222;GO:0005615;GO:0006508;GO:0008270
MHUMG1_1257	GO:0004190;GO:0006508;GO:0030246
MHUMG1_4004	GO:0004190;GO:0006508;GO:0030246
MHUMG1_9323	GO:0004190;GO:0006508;GO:0030246
MHUMG1_1147	GO:0004190;GO:0006508;GO:0016021
MHUMG1_3614	GO:0004190;GO:0006508;GO:0016021
MHUMG1_1886	GO:0004190;GO:0006508;GO:0016020
MHUMG1_10161	GO:0004190;GO:0006508
MHUMG1_10541	GO:0004190;GO:0006508
MHUMG1_10619	GO:0004190;GO:0006508
MHUMG1_1504	GO:0004190;GO:0006508
MHUMG1_1669	GO:0004190;GO:0006508
MHUMG1_1712	GO:0004190;GO:0006508
MHUMG1_1962	GO:0004190;GO:0006508
MHUMG1_211	GO:0004190;GO:0006508
MHUMG1_2248	GO:0004190;GO:0006508
MHUMG1_2940	GO:0004190;GO:0006508
MHUMG1_3611	GO:0004190;GO:0006508
MHUMG1_3672	GO:0004190;GO:0006508
MHUMG1_3748	GO:0004190;GO:0006508
MHUMG1_7416	GO:0004190;GO:0006508
MHUMG1_7678	GO:0004190;GO:0006508
MHUMG1_7692	GO:0004190;GO:0006508
MHUMG1_7818	GO:0004190;GO:0006508
MHUMG1_7906	GO:0004190;GO:0006508
MHUMG1_8400	GO:0004190;GO:0006508
MHUMG1_8423	GO:0004190;GO:0006508
MHUMG1_8696	GO:0004190;GO:0006508
MHUMG1_9427	GO:0004190;GO:0006508
MHUMG1_1972	GO:0004185;GO:0006508
MHUMG1_2546	GO:0004185;GO:0006508
MHUMG1_3341	GO:0004185;GO:0006508
MHUMG1_410	GO:0004185;GO:0006508
MHUMG1_7492	GO:0004185;GO:0006508
MHUMG1_7847	GO:0004185;GO:0006508
MHUMG1_7979	GO:0004185;GO:0006508
MHUMG1_9480	GO:0004185;GO:0006508
MHUMG1_2117	GO:0004185;GO:0005773;GO:0006508
MHUMG1_2118	GO:0004185;GO:0005773;GO:0006508
MHUMG1_7474	GO:0004180;GO:0006508
MHUMG1_8544	GO:0004177;GO:0006508;GO:0046872
MHUMG1_3775	GO:0004177;GO:0006508;GO:0006914
MHUMG1_3142	GO:0004177;GO:0006508
MHUMG1_7546	GO:0004177;GO:0004806;GO:0006508;GO:0016042;GO:0046486
MHUMG1_8258	GO:0004177;GO:0004806;GO:0006508;GO:0016042;GO:0046486
MHUMG1_6121	GO:0004096;GO:0006568;GO:0006804;GO:0006979;GO:0015947;GO:0020037;GO:0042744;GO:0046872;GO:0055114;GO:0098869
MHUMG1_9556	GO:0004064;GO:0016021
MHUMG1_491	GO:0003993;GO:0006771;GO:0016311;GO:0019497;GO:0046872
MHUMG1_5477	GO:0003993;GO:0006771;GO:0016311;GO:0019497
MHUMG1_8780	GO:0003993;GO:0006771;GO:0016311;GO:0019497
MHUMG1_2183	GO:0003993;GO:0004497;GO:0005506;GO:0006771;GO:0006810;GO:0016021;GO:0016311;GO:0016705;GO:0019497;GO:0020037;GO:0055114
MHUMG1_2858	GO:0003951;GO:0004622;GO:0006741;GO:0006769;GO:0009395;GO:0016310;GO:0019674;GO:0046497
MHUMG1_10274	GO:0003935;GO:0009231
MHUMG1_6868	GO:0003847;GO:0008247;GO:0016042;GO:0046486
MHUMG1_9367	GO:0003824;GO:0005975
MHUMG1_10218	GO:0003824;GO:0005576;GO:0009405
MHUMG1_7525	GO:0003824;GO:0005576;GO:0009405
MHUMG1_9046	GO:0003824;GO:0005576;GO:0009405
MHUMG1_9688	GO:0003824;GO:0005576;GO:0009405
MHUMG1_2906	GO:0003824
MHUMG1_3696	GO:0003824
MHUMG1_4810	GO:0003824
MHUMG1_646	GO:0003824
MHUMG1_3991	GO:0003796;GO:0005975;GO:0009253;GO:0016998
MHUMG1_5765	GO:0003796;GO:0005975;GO:0009253;GO:0016998
MHUMG1_7881	GO:0003796;GO:0005975;GO:0009253;GO:0016998
MHUMG1_5711	GO:0003796;GO:0005975;GO:0009253;GO:0016021;GO:0016998
MHUMG1_3726	GO:0003785;GO:0005622;GO:0030042;GO:0042989;GO:0044396;GO:0051014;GO:0051015
MHUMG1_4129	GO:0003746;GO:0003824;GO:0005576;GO:0005840;GO:0009405;GO:0043022;GO:0045901;GO:0045905
MHUMG1_35	GO:0003723;GO:0033897;GO:0090502
MHUMG1_4840	GO:0003723;GO:0033897;GO:0090502
MHUMG1_10543	GO:0003723;GO:0004540;GO:0051252;GO:0090501
MHUMG1_1753	GO:0003723;GO:0004521;GO:0051252;GO:0090502
MHUMG1_8679	GO:0003723;GO:0003824;GO:0005576;GO:0009405;GO:0045727
MHUMG1_7501	GO:0003677;GO:0005975;GO:0006355;GO:0006508;GO:0008233
MHUMG1_9767	GO:0003677;GO:0005634;GO:0006351;GO:0008270;GO:0016810
MHUMG1_5847	GO:0003677;GO:0005634;GO:0006351;GO:0008270;GO:0016787
MHUMG1_3272	GO:0003677;GO:0004553;GO:0005975;GO:0016021;GO:0030246
MHUMG1_9515	GO:0003677
MHUMG1_7623	GO:0003676;GO:0006355;GO:0008152;GO:0016491;GO:0046872
MHUMG1_3342	GO:0003676;GO:0004519;GO:0006308;GO:0090305
MHUMG1_6936	GO:0000747;GO:0005783;GO:0005886;GO:0015275;GO:0016021;GO:0016491;GO:0030437;GO:0055114;GO:0098703;GO:1901196
MHUMG1_8414	GO:0000324;GO:0005829;GO:0009166;GO:0016787
MHUMG1_4310	GO:0000287;GO:0005634;GO:0005829;GO:0016311;GO:0019284;GO:0019509;GO:0043715;GO:0043716;GO:0043874
MHUMG1_7306	GO:0000287;GO:0004427;GO:0005737;GO:0006119
MHUMG1_8541	GO:0000272;GO:0005982;GO:0005985;GO:0008810;GO:0030246
MHUMG1_7644	GO:0000272;GO:0005576;GO:0052761
MHUMG1_2601	GO:0000272;GO:0005576;GO:0006040;GO:0016977
MHUMG1_7332	GO:0000272;GO:0005576;GO:0006040;GO:0016977
MHUMG1_8378	GO:0000272;GO:0004568;GO:0005576;GO:0006032;GO:0008061;GO:0009405;GO:0016998;GO:0030248
MHUMG1_2483	GO:0000272;GO:0004568;GO:0005576;GO:0006032;GO:0008061;GO:0009405;GO:0016998
MHUMG1_3658	GO:0000272;GO:0004553
MHUMG1_4416	GO:0000226;GO:0000910;GO:0005576;GO:0008017;GO:0009405;GO:0045298
MHUMG1_2854	GO:0000166;GO:0009166;GO:0016021;GO:0016787
MHUMG1_9545	GO:0000166;GO:0004252;GO:0005618;GO:0006508;GO:0006810;GO:0016020;GO:0016887
MHUMG1_214	GO:0000144;GO:0004553;GO:0006037;GO:0008061;GO:0009277;GO:0016757;GO:0031505
MHUMG1_609	GO:0000103;GO:0004441;GO:0005634;GO:0005829;GO:0008441;GO:0016021;GO:0016311;GO:0046854;GO:0052829
MHUMG1_23	0
MHUMG1_28	0
MHUMG1_29	0
MHUMG1_46	0
MHUMG1_63	0
MHUMG1_1	0
MHUMG1_10007	0
MHUMG1_10015	0
MHUMG1_10026	0
MHUMG1_10032	0
MHUMG1_10038	0
MHUMG1_10113	0
MHUMG1_10134	0
MHUMG1_10147	0
MHUMG1_10186	0
MHUMG1_10210	0
MHUMG1_1022	0
MHUMG1_10293	0
MHUMG1_10297	0
MHUMG1_10298	0
MHUMG1_10299	0
MHUMG1_10331	0
MHUMG1_10348	0
MHUMG1_10377	0
MHUMG1_10399	0
MHUMG1_10400	0
MHUMG1_10412	0
MHUMG1_10425	0
MHUMG1_10453	0
MHUMG1_10491	0
MHUMG1_10507	0
MHUMG1_10523	0
MHUMG1_10525	0
MHUMG1_10565	0
MHUMG1_10571	0
MHUMG1_10585	0
MHUMG1_1146	0
MHUMG1_1175	0
MHUMG1_1237	0
MHUMG1_1244	0
MHUMG1_1314	0
MHUMG1_1327	0
MHUMG1_1385	0
MHUMG1_1389	0
MHUMG1_1415	0
MHUMG1_1416	0
MHUMG1_1432	0
MHUMG1_1448	0
MHUMG1_1474	0
MHUMG1_1485	0
MHUMG1_1751	0
MHUMG1_1784	0
MHUMG1_1791	0
MHUMG1_1811	0
MHUMG1_1817	0
MHUMG1_1872	0
MHUMG1_212	0
MHUMG1_2180	0
MHUMG1_2181	0
MHUMG1_2193	0
MHUMG1_2197	0
MHUMG1_2257	0
MHUMG1_2262	0
MHUMG1_2271	0
MHUMG1_2281	0
MHUMG1_2312	0
MHUMG1_2332	0
MHUMG1_2335	0
MHUMG1_2344	0
MHUMG1_2369	0
MHUMG1_240	0
MHUMG1_250	0
MHUMG1_2547	0
MHUMG1_2583	0
MHUMG1_2585	0
MHUMG1_2647	0
MHUMG1_2674	0
MHUMG1_2675	0
MHUMG1_2683	0
MHUMG1_2699	0
MHUMG1_2751	0
MHUMG1_2861	0
MHUMG1_2891	0
MHUMG1_2908	0
MHUMG1_2985	0
MHUMG1_3127	0
MHUMG1_3175	0
MHUMG1_3243	0
MHUMG1_3292	0
MHUMG1_334	0
MHUMG1_3551	0
MHUMG1_3607	0
MHUMG1_3671	0
MHUMG1_3701	0
MHUMG1_3713	0
MHUMG1_3744	0
MHUMG1_3761	0
MHUMG1_3820	0
MHUMG1_3824	0
MHUMG1_3832	0
MHUMG1_3854	0
MHUMG1_4019	0
MHUMG1_4022	0
MHUMG1_4064	0
MHUMG1_4133	0
MHUMG1_4211	0
MHUMG1_4215	0
MHUMG1_4266	0
MHUMG1_4268	0
MHUMG1_4271	0
MHUMG1_4283	0
MHUMG1_4366	0
MHUMG1_4413	0
MHUMG1_4454	0
MHUMG1_4494	0
MHUMG1_4496	0
MHUMG1_4536	0
MHUMG1_4542	0
MHUMG1_4553	0
MHUMG1_4595	0
MHUMG1_4717	0
MHUMG1_4741	0
MHUMG1_476	0
MHUMG1_4775	0
MHUMG1_4809	0
MHUMG1_4834	0
MHUMG1_4896	0
MHUMG1_4899	0
MHUMG1_4905	0
MHUMG1_4907	0
MHUMG1_4924	0
MHUMG1_4947	0
MHUMG1_5019	0
MHUMG1_502	0
MHUMG1_5045	0
MHUMG1_5066	0
MHUMG1_5131	0
MHUMG1_5182	0
MHUMG1_5214	0
MHUMG1_5216	0
MHUMG1_5222	0
MHUMG1_5302	0
MHUMG1_5430	0
MHUMG1_5469	0
MHUMG1_5506	0
MHUMG1_5507	0
MHUMG1_5515	0
MHUMG1_5537	0
MHUMG1_5584	0
MHUMG1_5671	0
MHUMG1_5705	0
MHUMG1_5760	0
MHUMG1_5762	0
MHUMG1_5767	0
MHUMG1_5778	0
MHUMG1_5785	0
MHUMG1_5787	0
MHUMG1_5916	0
MHUMG1_6011	0
MHUMG1_611	0
MHUMG1_6140	0
MHUMG1_6169	0
MHUMG1_620	0
MHUMG1_6310	0
MHUMG1_6361	0
MHUMG1_6362	0
MHUMG1_6371	0
MHUMG1_6372	0
MHUMG1_638	0
MHUMG1_6421	0
MHUMG1_6423	0
MHUMG1_6471	0
MHUMG1_6486	0
MHUMG1_6528	0
MHUMG1_6553	0
MHUMG1_6563	0
MHUMG1_6643	0
MHUMG1_6648	0
MHUMG1_6700	0
MHUMG1_6821	0
MHUMG1_6843	0
MHUMG1_7011	0
MHUMG1_7231	0
MHUMG1_7368	0
MHUMG1_7390	0
MHUMG1_7428	0
MHUMG1_7444	0
MHUMG1_7451	0
MHUMG1_7471	0
MHUMG1_7476	0
MHUMG1_7508	0
MHUMG1_7552	0
MHUMG1_7573	0
MHUMG1_7607	0
MHUMG1_7615	0
MHUMG1_7648	0
MHUMG1_7657	0
MHUMG1_7720	0
MHUMG1_7806	0
MHUMG1_7934	0
MHUMG1_7938	0
MHUMG1_7956	0
MHUMG1_7957	0
MHUMG1_7958	0
MHUMG1_7984	0
MHUMG1_7986	0
MHUMG1_810	0
MHUMG1_8122	0
MHUMG1_8212	0
MHUMG1_8214	0
MHUMG1_8216	0
MHUMG1_8220	0
MHUMG1_8240	0
MHUMG1_8267	0
MHUMG1_827	0
MHUMG1_8304	0
MHUMG1_8359	0
MHUMG1_8368	0
MHUMG1_8376	0
MHUMG1_8382	0
MHUMG1_8429	0
MHUMG1_8465	0
MHUMG1_8467	0
MHUMG1_8521	0
MHUMG1_8547	0
MHUMG1_8618	0
MHUMG1_8623	0
MHUMG1_8631	0
MHUMG1_8634	0
MHUMG1_8672	0
MHUMG1_8680	0
MHUMG1_8688	0
MHUMG1_8709	0
MHUMG1_8711	0
MHUMG1_8747	0
MHUMG1_8763	0
MHUMG1_8779	0
MHUMG1_8835	0
MHUMG1_8837	0
MHUMG1_8880	0
MHUMG1_8949	0
MHUMG1_8951	0
MHUMG1_8970	0
MHUMG1_8971	0
MHUMG1_8997	0
MHUMG1_9016	0
MHUMG1_9023	0
MHUMG1_9079	0
MHUMG1_9103	0
MHUMG1_9227	0
MHUMG1_926	0
MHUMG1_9274	0
MHUMG1_9340	0
MHUMG1_9356	0
MHUMG1_9386	0
MHUMG1_9402	0
MHUMG1_9451	0
MHUMG1_9524	0
MHUMG1_9528	0
MHUMG1_9537	0
MHUMG1_9569	0
MHUMG1_9609	0
MHUMG1_9624	0
MHUMG1_9636	0
MHUMG1_9652	0
MHUMG1_9653	0
MHUMG1_9660	0
MHUMG1_9675	0
MHUMG1_9697	0
MHUMG1_9698	0
MHUMG1_9731	0
MHUMG1_975	0
MHUMG1_9770	0
MHUMG1_9781	0
MHUMG1_9819	0
MHUMG1_9832	0
MHUMG1_9834	0
MHUMG1_9845	0
MHUMG1_9850	0
MHUMG1_9860	0
MHUMG1_9879	0
MHUMG1_9893	0
MHUMG1_993	0
MHUMG1_9973	0
MHUMG1_9982	0
MHUMG1_9983	0

## Sheet: Pfam
SECRETOME - M. humberi ESALQ1638
Gene name	pfam
MHUMG1_1	PF00024
MHUMG1_1	PF08276
MHUMG1_10	PF08926
MHUMG1_10	PF00704
MHUMG1_10007	PF05730
MHUMG1_10009	PF01565
MHUMG1_10013	PF03632
MHUMG1_10013	PF03636
MHUMG1_10028	PF00089
MHUMG1_10028	PF13365
MHUMG1_10042	PF00089
MHUMG1_10042	PF13365
MHUMG1_10121	PF00089
MHUMG1_10121	PF13365
MHUMG1_10132	PF17801
MHUMG1_10143	PF00041
MHUMG1_10143	PF00657
MHUMG1_10143	PF13472
MHUMG1_10154	PF07470
MHUMG1_10175	PF03583
MHUMG1_10179	PF00082
MHUMG1_10179	PF06280
MHUMG1_10180	PF01565
MHUMG1_10180	PF08031
MHUMG1_10183	PF00089
MHUMG1_10183	PF13365
MHUMG1_10218	PF01375
MHUMG1_10300	PF13933
MHUMG1_1031	PF00734
MHUMG1_1031	PF05572
MHUMG1_10370	PF01532
MHUMG1_10400	PF07691
MHUMG1_10400	PF10528
MHUMG1_10400	PF00067
MHUMG1_1051	PF14200
MHUMG1_10523	PF00135
MHUMG1_10532	PF05577
MHUMG1_10541	PF00026
MHUMG1_10546	PF00070
MHUMG1_10546	PF00890
MHUMG1_10546	PF01266
MHUMG1_10546	PF01494
MHUMG1_10546	PF07992
MHUMG1_10546	PF13450
MHUMG1_10585	PF10342
MHUMG1_1067	PF00082
MHUMG1_1067	PF05922
MHUMG1_1072	PF00704
MHUMG1_1080	PF01185
MHUMG1_1101	PF04616
MHUMG1_1101	PF06439
MHUMG1_1112	PF00149
MHUMG1_1139	PF00188
MHUMG1_1147	PF00026
MHUMG1_1180	PF03583
MHUMG1_1206	PF04573
MHUMG1_1257	PF01828
MHUMG1_1266	PF03583
MHUMG1_1314	PF00754
MHUMG1_1314	PF09118
MHUMG1_1323	PF02434
MHUMG1_1323	PF04646
MHUMG1_1333	PF03068
MHUMG1_1438	PF00135
MHUMG1_1468	PF07971
MHUMG1_1468	PF17678
MHUMG1_1504	PF00026
MHUMG1_1504	PF14543
MHUMG1_1669	PF00026
MHUMG1_1712	PF00026
MHUMG1_1712	PF14543
MHUMG1_1753	PF00545
MHUMG1_1784	PF00135
MHUMG1_1784	PF07859
MHUMG1_1791	PF01822
MHUMG1_1791	PF01822
MHUMG1_1791	PF01822
MHUMG1_1791	PF01822
MHUMG1_1864	PF00722
MHUMG1_1882	PF00082
MHUMG1_1882	PF09286
MHUMG1_1886	PF00026
MHUMG1_1896	PF00722
MHUMG1_1899	PF11790
MHUMG1_1945	PF00933
MHUMG1_1945	PF01915
MHUMG1_1945	PF14310
MHUMG1_1962	PF00026
MHUMG1_1972	PF00450
MHUMG1_2014	PF01565
MHUMG1_2023	PF00082
MHUMG1_2023	PF05922
MHUMG1_2107	PF00722
MHUMG1_211	PF00026
MHUMG1_2118	PF00450
MHUMG1_2118	PF05388
MHUMG1_214	PF00722
MHUMG1_2159	PF05089
MHUMG1_2159	PF12971
MHUMG1_2159	PF12972
MHUMG1_2183	PF00149
MHUMG1_2183	PF14008
MHUMG1_2183	PF16656
MHUMG1_2248	PF00026
MHUMG1_2248	PF14543
MHUMG1_2262	PF14388
MHUMG1_2271	PF01547
MHUMG1_2271	PF13343
MHUMG1_2271	PF13416
MHUMG1_2271	PF13531
MHUMG1_2356	PF03198
MHUMG1_2369	PF09949
MHUMG1_243	PF00190
MHUMG1_243	PF00190
MHUMG1_243	PF07883
MHUMG1_243	PF07883
MHUMG1_2531	PF00251
MHUMG1_2534	PF00704
MHUMG1_2546	PF00450
MHUMG1_2565	PF07992
MHUMG1_2565	PF13434
MHUMG1_2585	PF16541
MHUMG1_2601	PF07335
MHUMG1_2617	PF00722
MHUMG1_2670	PF00089
MHUMG1_2674	PF11327
MHUMG1_2675	PF14856
MHUMG1_2678	PF00491
MHUMG1_2683	PF14273
MHUMG1_278	PF00890
MHUMG1_278	PF01494
MHUMG1_278	PF13450
MHUMG1_28 20	PF04681
MHUMG1_2838	PF03663
MHUMG1_2854	PF00149
MHUMG1_2854	PF02872
MHUMG1_2858	PF01735
MHUMG1_2861	PF05730
MHUMG1_2897	PF03068
MHUMG1_2899	PF00775
MHUMG1_2906	PF07944
MHUMG1_2919	PF01593
MHUMG1_2919	PF13450
MHUMG1_2940	PF00026
MHUMG1_2940	PF14543
MHUMG1_301	PF01822
MHUMG1_3098	PF09286
MHUMG1_3115	PF00394
MHUMG1_3115	PF07731
MHUMG1_3115	PF07732
MHUMG1_3136	PF00295
MHUMG1_3142	PF00557
MHUMG1_3144	PF01764
MHUMG1_3150	PF12708
MHUMG1_3150	PF12708
MHUMG1_3243	PF07510
MHUMG1_3325	PF00082
MHUMG1_3336	PF00657
MHUMG1_3341	PF00450
MHUMG1_3342	PF02265
MHUMG1_3489	PF00082
MHUMG1_3489	PF06280
MHUMG1_35 54	PF00445
MHUMG1_3508	PF01764
MHUMG1_3550	PF00394
MHUMG1_3550	PF07731
MHUMG1_3550	PF07732
MHUMG1_3586	PF00082
MHUMG1_3586	PF05922
MHUMG1_3607	PF12296
MHUMG1_3614	PF00026
MHUMG1_3662	PF03583
MHUMG1_3672	PF00026
MHUMG1_3726	PF01822
MHUMG1_3744	PF12697
MHUMG1_3748	PF00026
MHUMG1_3761	PF03781
MHUMG1_3763	PF00576
MHUMG1_3775	PF00561
MHUMG1_3775	PF08386
MHUMG1_3844	PF00722
MHUMG1_3854	PF11327
MHUMG1_3892	PF07971
MHUMG1_3892	PF17678
MHUMG1_3916	PF03583
MHUMG1_3916	PF12697
MHUMG1_3947	PF01764
MHUMG1_3972	PF00141
MHUMG1_3991	PF00959
MHUMG1_3997	PF00135
MHUMG1_3997	PF07859
MHUMG1_4004	PF01828
MHUMG1_4068	PF00149
MHUMG1_410	PF00450
MHUMG1_4112	PF01301
MHUMG1_4112	PF10435
MHUMG1_4112	PF13363
MHUMG1_4112	PF13364
MHUMG1_4112	PF13364
MHUMG1_4129	PF01375
MHUMG1_4206	PF10287
MHUMG1_4206	PF10290
MHUMG1_4211	PF12296
MHUMG1_4279	PF00135
MHUMG1_4279	PF07859
MHUMG1_4283	PF00050
MHUMG1_4393	PF01764
MHUMG1_4416	PF09044
MHUMG1_4417	PF09044
MHUMG1_4430	PF03583
MHUMG1_4473	PF06500
MHUMG1_4473	PF12697
MHUMG1_4475	PF00388
MHUMG1_4477	PF00082
MHUMG1_4477	PF06280
MHUMG1_45 27	PF00089
MHUMG1_4557	PF00732
MHUMG1_4557	PF05199
MHUMG1_4579	PF01301
MHUMG1_4579	PF02449
MHUMG1_4616	PF05935
MHUMG1_4616	PF14269
MHUMG1_4624	PF03443
MHUMG1_4635	PF01565
MHUMG1_4635	PF08031
MHUMG1_4652	PF14099
MHUMG1_4693	PF03663
MHUMG1_4717	PF10282
MHUMG1_4775	PF03856
MHUMG1_4840	PF00445
MHUMG1_4897	PF02727
MHUMG1_491	PF00149
MHUMG1_491	PF14008
MHUMG1_491	PF16656
MHUMG1_4922	PF04185
MHUMG1_4924	PF11327
MHUMG1_5007	PF03663
MHUMG1_5018	PF06824
MHUMG1_5018	PF06824
MHUMG1_502	PF03080
MHUMG1_5173	PF01755
MHUMG1_5214	PF04681
MHUMG1_5216	PF05730
MHUMG1_5224	PF16862
MHUMG1_5289	PF01120
MHUMG1_5302	PF11937
MHUMG1_5388	PF00150
MHUMG1_5477	PF00328
MHUMG1_5504	PF01975
MHUMG1_5507	PF14040
MHUMG1_5651	PF01083
MHUMG1_5675	PF07470
MHUMG1_5703	PF01979
MHUMG1_5709	PF01975
MHUMG1_5711	PF01183
MHUMG1_5716	PF12146
MHUMG1_5716	PF12697
MHUMG1_5719	PF03572
MHUMG1_5765	PF00959
MHUMG1_5772	PF00561
MHUMG1_5772	PF06441
MHUMG1_5772	PF12697
MHUMG1_5773	PF00089
MHUMG1_5773	PF13365
MHUMG1_5787	PF00144
MHUMG1_5790	PF01055
MHUMG1_5790	PF13802
MHUMG1_5790	PF16863
MHUMG1_5809	PF00082
MHUMG1_582	PF00264
MHUMG1_5823	PF01565
MHUMG1_5823	PF08031
MHUMG1_5832	PF01266
MHUMG1_5832	PF13450
MHUMG1_5841	PF00583
MHUMG1_5841	PF13508
MHUMG1_5841	PF13673
MHUMG1_5847	PF03659
MHUMG1_5860	PF00089
MHUMG1_5875	PF12708
MHUMG1_5875	PF12708
MHUMG1_5894	PF00933
MHUMG1_5894	PF01915
MHUMG1_5894	PF14310
MHUMG1_5976	PF03572
MHUMG1_609	PF00459
MHUMG1_6121	PF00199
MHUMG1_6121	PF06628
MHUMG1_6121	PF18011
MHUMG1_6169	PF12138
MHUMG1_6371	PF05730
MHUMG1_6372	PF05730
MHUMG1_638	PF13449
MHUMG1_6471	PF05730
MHUMG1_6481	PF00080
MHUMG1_6486	PF00188
MHUMG1_6528	PF10342
MHUMG1_6605	PF01764
MHUMG1_663	PF01532
MHUMG1_6670	PF01425
MHUMG1_6700	PF01822
MHUMG1_6700	PF01822
MHUMG1_6700	PF01822
MHUMG1_6700	PF01822
MHUMG1_6700	PF01822
MHUMG1_6700	PF07250
MHUMG1_6700	PF09118
MHUMG1_6751	PF04185
MHUMG1_6783	PF10342
MHUMG1_6868	PF03403
MHUMG1_6936	PF12929
MHUMG1_6943	PF01546
MHUMG1_6943	PF02225
MHUMG1_6943	PF04389
MHUMG1_7047	PF00141
MHUMG1_7047	PF01822
MHUMG1_7047	PF01822
MHUMG1_7047	PF01822
MHUMG1_7066	PF00082
MHUMG1_7066	PF09286
MHUMG1_7088	PF00561
MHUMG1_7088	PF01674
MHUMG1_7088	PF12697
MHUMG1_7138	PF10528
MHUMG1_7174	PF07519
MHUMG1_7194	PF09044
MHUMG1_7194	PF09044
MHUMG1_7206	PF00704
MHUMG1_723	PF00399
MHUMG1_723	PF00399
MHUMG1_723	PF00399
MHUMG1_724	PF02128
MHUMG1_724	PF07504
MHUMG1_7306	PF00719
MHUMG1_7308	PF01204
MHUMG1_7308	PF06202
MHUMG1_7331	PF01464
MHUMG1_7332	PF07335
MHUMG1_7333	PF00082
MHUMG1_7333	PF09286
MHUMG1_7335	PF00023
MHUMG1_7335	PF00023
MHUMG1_7335	PF00190
MHUMG1_7335	PF12796
MHUMG1_7335	PF12796
MHUMG1_7335	PF13637
MHUMG1_7335	PF13857
MHUMG1_7392	PF00082
MHUMG1_7393	PF00082
MHUMG1_7394	PF07519
MHUMG1_7416	PF00026
MHUMG1_7416	PF14543
MHUMG1_7422	PF00082
MHUMG1_7440	PF00135
MHUMG1_7441	PF01185
MHUMG1_7483	PF00080
MHUMG1_7508	PF06013
MHUMG1_7510	PF00326
MHUMG1_7510	PF00930
MHUMG1_7525	PF01375
MHUMG1_7535	PF01263
MHUMG1_7546	PF03583
MHUMG1_7546	PF12697
MHUMG1_7576	PF00082
MHUMG1_7576	PF09286
MHUMG1_7604	PF00089
MHUMG1_7615	PF13229
MHUMG1_7615	PF13229
MHUMG1_7617	PF01565
MHUMG1_7617	PF08031
MHUMG1_7644	PF00703
MHUMG1_7644	PF17786
MHUMG1_7644	PF18368
MHUMG1_7657	PF00106
MHUMG1_7657	PF13561
MHUMG1_7678	PF00026
MHUMG1_7692	PF00026
MHUMG1_7692	PF14543
MHUMG1_7720	PF02469
MHUMG1_7720	PF02469
MHUMG1_7796	PF00149
MHUMG1_78	PF02225
MHUMG1_78	PF00082
MHUMG1_78	PF06280
MHUMG1_7805	PF01764
MHUMG1_7818	PF00026
MHUMG1_7832	PF04179
MHUMG1_7832	PF17184
MHUMG1_7847	PF00450
MHUMG1_7881	PF01183
MHUMG1_7906	PF00026
MHUMG1_7906	PF14543
MHUMG1_7920	PF00089
MHUMG1_7934	PF14040
MHUMG1_7944	PF00732
MHUMG1_7944	PF05199
MHUMG1_7946	PF00082
MHUMG1_7946	PF09286
MHUMG1_7956	PF05730
MHUMG1_7957	PF01822
MHUMG1_7957	PF01822
MHUMG1_7964	PF00082
MHUMG1_7972	PF05257
MHUMG1_7979	PF00450
MHUMG1_7984	PF03984
MHUMG1_7984	PF03984
MHUMG1_7984	PF03984
MHUMG1_8152	PF05730
MHUMG1_8212	PF10528
MHUMG1_8245	PF00704
MHUMG1_8245	PF07859
MHUMG1_8256	PF00082
MHUMG1_8262	PF00082
MHUMG1_8262	PF05922
MHUMG1_8282	PF00082
MHUMG1_8322	PF00732
MHUMG1_8322	PF05199
MHUMG1_8378	PF00704
MHUMG1_8385	PF05694
MHUMG1_8400	PF00026
MHUMG1_8414	PF00149
MHUMG1_8445	PF08787
MHUMG1_8496	PF00561
MHUMG1_8496	PF08386
MHUMG1_8499	PF03022
MHUMG1_8521	PF12296
MHUMG1_8532	PF01375
MHUMG1_8541	PF01670
MHUMG1_8542	PF00150
MHUMG1_8544	PF01546
MHUMG1_8544	PF04389
MHUMG1_8552	PF00394
MHUMG1_8552	PF07731
MHUMG1_8552	PF07732
MHUMG1_8583	PF00135
MHUMG1_8602	PF00704
MHUMG1_8616	PF00734
MHUMG1_8616	PF05572
MHUMG1_8624	PF01822
MHUMG1_8679	PF01375
MHUMG1_8688	PF09792
MHUMG1_8696	PF00026
MHUMG1_8768	PF04082
MHUMG1_8768	PF07971
MHUMG1_8768	PF17678
MHUMG1_8780	PF00328
MHUMG1_8782	PF01735
MHUMG1_8782	PF01735
MHUMG1_8793	PF00082
MHUMG1_8793	PF06280
MHUMG1_8797	PF00732
MHUMG1_8797	PF05199
MHUMG1_8797	PF13450
MHUMG1_8840	PF04185
MHUMG1_8877	PF03068
MHUMG1_8877	PF03068
MHUMG1_8877	PF09286
MHUMG1_8965	PF00089
MHUMG1_8968	PF00128
MHUMG1_897	PF00775
MHUMG1_8970	PF12296
MHUMG1_8971	PF12296
MHUMG1_8981	PF00149
MHUMG1_8997	PF03330
MHUMG1_9016	PF12296
MHUMG1_9017	PF00082
MHUMG1_9017	PF05922
MHUMG1_9046	PF01375
MHUMG1_9103	PF07249
MHUMG1_9108	PF01565
MHUMG1_9138	PF09286
MHUMG1_9182	PF00890
MHUMG1_9182	PF01593
MHUMG1_9182	PF04820
MHUMG1_9182	PF13450
MHUMG1_9241	PF00561
MHUMG1_9241	PF12697
MHUMG1_9247	PF07971
MHUMG1_9247	PF17678
MHUMG1_926	PF07510
MHUMG1_9278	PF01565
MHUMG1_9278	PF08031
MHUMG1_9289	PF01425
MHUMG1_9289	PF01425
MHUMG1_9295	PF02983
MHUMG1_9316	PF00704
MHUMG1_932	PF00657
MHUMG1_9323	PF01828
MHUMG1_9335	PF03583
MHUMG1_9354	PF11790
MHUMG1_9356	PF07452
MHUMG1_9357	PF05572
MHUMG1_9357	PF13688
MHUMG1_939	PF12850
MHUMG1_9399	PF03583
MHUMG1_9402	PF13577
MHUMG1_9427	PF00026
MHUMG1_9439	PF00264
MHUMG1_9440	PF09286
MHUMG1_9457	PF00890
MHUMG1_9457	PF01494
MHUMG1_9457	PF13450
MHUMG1_9470	PF01593
MHUMG1_9470	PF12831
MHUMG1_9470	PF13450
MHUMG1_9480	PF00450
MHUMG1_9503	PF02838
MHUMG1_9503	PF07555
MHUMG1_9504	PF00082
MHUMG1_9528	PF09056
MHUMG1_9540	PF03022
MHUMG1_9545	PF00082
MHUMG1_9545	PF06280
MHUMG1_9556	PF01731
MHUMG1_9558	PF04185
MHUMG1_9593	PF05572
MHUMG1_9609	PF08239
MHUMG1_9624	PF14388
MHUMG1_9633	PF13933
MHUMG1_9636	PF00144
MHUMG1_9662	PF00394
MHUMG1_9662	PF07731
MHUMG1_9662	PF07732
MHUMG1_9666	PF01425
MHUMG1_9668	PF02102
MHUMG1_9668	PF14521
MHUMG1_9688	PF01375
MHUMG1_9734	PF03663
MHUMG1_974	PF07992
MHUMG1_9740	PF00903
MHUMG1_9769	PF05089
MHUMG1_9769	PF12971
MHUMG1_9769	PF12972
MHUMG1_9778	PF00082
MHUMG1_9778	PF00082
MHUMG1_9826	PF02102
MHUMG1_9826	PF14521
MHUMG1_9842	PF13279
MHUMG1_9860	PF07859
MHUMG1_9860	PF10340
MHUMG1_9863	PF00089
MHUMG1_9865	PF00394
MHUMG1_9865	PF07731
MHUMG1_9865	PF07732
MHUMG1_9881	PF00394
MHUMG1_9881	PF07731
MHUMG1_9881	PF07732
MHUMG1_9882	PF00082
MHUMG1_9891	PF00704
MHUMG1_9904	PF00394
MHUMG1_9904	PF07731
MHUMG1_9904	PF07732
MHUMG1_9948	PF00732
MHUMG1_9948	PF05199
MHUMG1_9948	PF13450
MHUMG1_9954	PF01425
MHUMG1_9974	PF00089
MHUMG1_9974	PF13365
MHUMG1_9977	PF01522
MHUMG1_9993	PF04488

## Sheet: Enzymes
SECRETOME - M. humberi ESALQ1638
Final secreted proteins	Enzyme code
MHUMG1_243	EC:5.1.3.13
MHUMG1_9666	EC:4.2.1.94
MHUMG1_7306	EC:3.6.1.1
MHUMG1_10274	EC:3.5.4.25
MHUMG1_1333	EC:3.5.3.15
MHUMG1_2897	EC:3.5.3.15
MHUMG1_3763	EC:3.5.2.17
MHUMG1_10143	EC:3.4.24
MHUMG1_9668	EC:3.4.24
MHUMG1_9826	EC:3.4.24
MHUMG1_724	EC:3.4.24
MHUMG1_211	EC:3.4.23
MHUMG1_1257	EC:3.4.23
MHUMG1_4004	EC:3.4.23
MHUMG1_9323	EC:3.4.23
MHUMG1_1147	EC:3.4.23
MHUMG1_3614	EC:3.4.23
MHUMG1_1886	EC:3.4.23
MHUMG1_10161	EC:3.4.23
MHUMG1_10541	EC:3.4.23
MHUMG1_10619	EC:3.4.23
MHUMG1_1504	EC:3.4.23
MHUMG1_1669	EC:3.4.23
MHUMG1_1712	EC:3.4.23
MHUMG1_1962	EC:3.4.23
MHUMG1_2248	EC:3.4.23
MHUMG1_2940	EC:3.4.23
MHUMG1_3611	EC:3.4.23
MHUMG1_3672	EC:3.4.23
MHUMG1_3748	EC:3.4.23
MHUMG1_7416	EC:3.4.23
MHUMG1_7678	EC:3.4.23
MHUMG1_7692	EC:3.4.23
MHUMG1_7818	EC:3.4.23
MHUMG1_7906	EC:3.4.23
MHUMG1_8400	EC:3.4.23
MHUMG1_8423	EC:3.4.23
MHUMG1_8696	EC:3.4.23
MHUMG1_9427	EC:3.4.23
MHUMG1_9545	EC:3.4.21;EC:3.6.1.3;EC:3.6.1.15
MHUMG1_8877	EC:3.4.21;EC:3.5.3.15
MHUMG1_1972	EC:3.4.21;EC:3.4.16
MHUMG1_2546	EC:3.4.21;EC:3.4.16
MHUMG1_3341	EC:3.4.21;EC:3.4.16
MHUMG1_410	EC:3.4.21;EC:3.4.16
MHUMG1_7492	EC:3.4.21;EC:3.4.16
MHUMG1_7847	EC:3.4.21;EC:3.4.16
MHUMG1_7979	EC:3.4.21;EC:3.4.16
MHUMG1_9480	EC:3.4.21;EC:3.4.16
MHUMG1_2117	EC:3.4.21;EC:3.4.16
MHUMG1_2118	EC:3.4.21;EC:3.4.16
MHUMG1_10	EC:3.4.21;EC:3.2.1.14
MHUMG1_9138	EC:3.4.21;EC:2.7.1.39
MHUMG1_45	EC:3.4.21
MHUMG1_78	EC:3.4.21
MHUMG1_10028	EC:3.4.21
MHUMG1_10042	EC:3.4.21
MHUMG1_10121	EC:3.4.21
MHUMG1_10183	EC:3.4.21
MHUMG1_10404	EC:3.4.21
MHUMG1_10482	EC:3.4.21
MHUMG1_10621	EC:3.4.21
MHUMG1_1067	EC:3.4.21
MHUMG1_1882	EC:3.4.21
MHUMG1_2670	EC:3.4.21
MHUMG1_3098	EC:3.4.21
MHUMG1_3325	EC:3.4.21
MHUMG1_3586	EC:3.4.21
MHUMG1_5773	EC:3.4.21
MHUMG1_5809	EC:3.4.21
MHUMG1_5860	EC:3.4.21
MHUMG1_7066	EC:3.4.21
MHUMG1_7333	EC:3.4.21
MHUMG1_7392	EC:3.4.21
MHUMG1_7393	EC:3.4.21
MHUMG1_7422	EC:3.4.21
MHUMG1_7576	EC:3.4.21
MHUMG1_7604	EC:3.4.21
MHUMG1_7920	EC:3.4.21
MHUMG1_7946	EC:3.4.21
MHUMG1_7964	EC:3.4.21
MHUMG1_8256	EC:3.4.21
MHUMG1_8262	EC:3.4.21
MHUMG1_8325	EC:3.4.21
MHUMG1_8965	EC:3.4.21
MHUMG1_9440	EC:3.4.21
MHUMG1_9504	EC:3.4.21
MHUMG1_9686	EC:3.4.21
MHUMG1_9778	EC:3.4.21
MHUMG1_9863	EC:3.4.21
MHUMG1_9882	EC:3.4.21
MHUMG1_9974	EC:3.4.21
MHUMG1_10179	EC:3.4.21
MHUMG1_2137	EC:3.4.21
MHUMG1_3489	EC:3.4.21
MHUMG1_4477	EC:3.4.21
MHUMG1_7521	EC:3.4.21
MHUMG1_8793	EC:3.4.21
MHUMG1_1713	EC:3.4.21
MHUMG1_2023	EC:3.4.21
MHUMG1_8282	EC:3.4.21
MHUMG1_9017	EC:3.4.21
MHUMG1_9295	EC:3.4.21
MHUMG1_7546	EC:3.4.11;EC:3.1.1.1;EC:3.1.1.3
MHUMG1_8258	EC:3.4.11;EC:3.1.1.1;EC:3.1.1.3
MHUMG1_8544	EC:3.4.11
MHUMG1_3775	EC:3.4.11
MHUMG1_3142	EC:3.4.11
MHUMG1_5772	EC:3.3.2.9
MHUMG1_5289	EC:3.2.1.51
MHUMG1_8541	EC:3.2.1.4
MHUMG1_4800	EC:3.2.1.35
MHUMG1_7308	EC:3.2.1.28
MHUMG1_4112	EC:3.2.1.23
MHUMG1_4579	EC:3.2.1.23
MHUMG1_1945	EC:3.2.1.21
MHUMG1_5894	EC:3.2.1.21
MHUMG1_3991	EC:3.2.1.17
MHUMG1_5765	EC:3.2.1.17
MHUMG1_7881	EC:3.2.1.17
MHUMG1_5711	EC:3.2.1.17
MHUMG1_7644	EC:3.2.1.165
MHUMG1_3136	EC:3.2.1.15
MHUMG1_1072	EC:3.2.1.14
MHUMG1_7206	EC:3.2.1.14
MHUMG1_8245	EC:3.2.1.14
MHUMG1_8602	EC:3.2.1.14
MHUMG1_8378	EC:3.2.1.14
MHUMG1_2483	EC:3.2.1.14
MHUMG1_2601	EC:3.2.1.132
MHUMG1_7332	EC:3.2.1.132
MHUMG1_10370	EC:3.2.1.113;EC:3.2.1.24
MHUMG1_663	EC:3.2.1.113;EC:3.2.1.24
MHUMG1_2838	EC:3.2.1.101;EC:3.2.1.24
MHUMG1_9734	EC:3.2.1.101;EC:3.2.1.24
MHUMG1_7796	EC:3.1.4.12
MHUMG1_8981	EC:3.1.4.12
MHUMG1_4002	EC:3.1.4.11
MHUMG1_35	EC:3.1.31;EC:3.1.27;EC:3.1.27.1
MHUMG1_4840	EC:3.1.31;EC:3.1.27;EC:3.1.27.1
MHUMG1_4310	EC:3.1.3.77;EC:3.1.3.41
MHUMG1_609	EC:3.1.3.7;EC:3.1.3.57;EC:3.1.3.41;EC:3.1.3.31
MHUMG1_491	EC:3.1.3.41;EC:3.1.3.2
MHUMG1_5477	EC:3.1.3.41;EC:3.1.3.2
MHUMG1_8780	EC:3.1.3.41;EC:3.1.3.2
MHUMG1_2183	EC:3.1.3.41;EC:3.1.3.2
MHUMG1_7174	EC:3.1.1.73;EC:3.1.1.1
MHUMG1_8782	EC:3.1.1.5;EC:3.1.1.1
MHUMG1_2858	EC:3.1.1.5;EC:2.7.1.23;EC:3.1.1.1
MHUMG1_6868	EC:3.1.1.47;EC:3.1.1.1
MHUMG1_9556	EC:3.1.1.2;EC:3.1.1.1
MHUMG1_10175	EC:3.1.1.1;EC:3.1.1.3
MHUMG1_1180	EC:3.1.1.1;EC:3.1.1.3
MHUMG1_3662	EC:3.1.1.1;EC:3.1.1.3
MHUMG1_3916	EC:3.1.1.1;EC:3.1.1.3
MHUMG1_4430	EC:3.1.1.1;EC:3.1.1.3
MHUMG1_9335	EC:3.1.1.1;EC:3.1.1.3
MHUMG1_9399	EC:3.1.1.1;EC:3.1.1.3
MHUMG1_1266	EC:3.1.1.1;EC:3.1.1.3
MHUMG1_9641	EC:1.8.3.2
MHUMG1_4897	EC:1.4.3.21
MHUMG1_897	EC:1.13.11
MHUMG1_2899	EC:1.13.11
MHUMG1_6121	EC:1.11.1.7;EC:1.11.1.6
MHUMG1_7047	EC:1.11.1.7
MHUMG1_3972	EC:1.11.1.7
MHUMG1_8797	EC:1.1.3.4;EC:1.1.3.5
MHUMG1_1	0
MHUMG1_212	0
MHUMG1_240	0
MHUMG1_250	0
MHUMG1_334	0
MHUMG1_476	0
MHUMG1_502	0
MHUMG1_214	0
MHUMG1_278	0
MHUMG1_246	0
MHUMG1_153	0
MHUMG1_301	0
MHUMG1_582	0
MHUMG1_23	0
MHUMG1_28	0
MHUMG1_29	0
MHUMG1_34	0
MHUMG1_46	0
MHUMG1_63	0
MHUMG1_10239	0
MHUMG1_9740	0
MHUMG1_8499	0
MHUMG1_1051	0
MHUMG1_787	0
MHUMG1_4652	0
MHUMG1_8445	0
MHUMG1_9291	0
MHUMG1_10361	0
MHUMG1_3336	0
MHUMG1_4922	0
MHUMG1_8840	0
MHUMG1_932	0
MHUMG1_9558	0
MHUMG1_3150	0
MHUMG1_5875	0
MHUMG1_1112	0
MHUMG1_1438	0
MHUMG1_2159	0
MHUMG1_3997	0
MHUMG1_4279	0
MHUMG1_4473	0
MHUMG1_4624	0
MHUMG1_4693	0
MHUMG1_5007	0
MHUMG1_5224	0
MHUMG1_5504	0
MHUMG1_5709	0
MHUMG1_5716	0
MHUMG1_7088	0
MHUMG1_7288	0
MHUMG1_7307	0
MHUMG1_7331	0
MHUMG1_7354	0
MHUMG1_7440	0
MHUMG1_7789	0
MHUMG1_7972	0
MHUMG1_8152	0
MHUMG1_8583	0
MHUMG1_8757	0
MHUMG1_8776	0
MHUMG1_9154	0
MHUMG1_9241	0
MHUMG1_9503	0
MHUMG1_9741	0
MHUMG1_9769	0
MHUMG1_9831	0
MHUMG1_9994	0
MHUMG1_6670	0
MHUMG1_9954	0
MHUMG1_1323	0
MHUMG1_4616	0
MHUMG1_8624	0
MHUMG1_10180	0
MHUMG1_10220	0
MHUMG1_2014	0
MHUMG1_3732	0
MHUMG1_4557	0
MHUMG1_4635	0
MHUMG1_5823	0
MHUMG1_7617	0
MHUMG1_7944	0
MHUMG1_8322	0
MHUMG1_9108	0
MHUMG1_9278	0
MHUMG1_9948	0
MHUMG1_2565	0
MHUMG1_2919	0
MHUMG1_5832	0
MHUMG1_9182	0
MHUMG1_974	0
MHUMG1_9439	0
MHUMG1_9470	0
MHUMG1_860	0
MHUMG1_1378	0
MHUMG1_9289	0
MHUMG1_4068	0
MHUMG1_7394	0
MHUMG1_8496	0
MHUMG1_8315	0
MHUMG1_9993	0
MHUMG1_10073	0
MHUMG1_1567	0
MHUMG1_1871	0
MHUMG1_2174	0
MHUMG1_2366	0
MHUMG1_5042	0
MHUMG1_5717	0
MHUMG1_5908	0
MHUMG1_6783	0
MHUMG1_7810	0
MHUMG1_8276	0
MHUMG1_8340	0
MHUMG1_8404	0
MHUMG1_892	0
MHUMG1_9540	0
MHUMG1_9842	0
MHUMG1_5173	0
MHUMG1_10009	0
MHUMG1_3994	0
MHUMG1_8225	0
MHUMG1_7069	0
MHUMG1_5460	0
MHUMG1_8385	0
MHUMG1_10124	0
MHUMG1_9620	0
MHUMG1_4493	0
MHUMG1_2650	0
MHUMG1_10154	0
MHUMG1_5018	0
MHUMG1_5675	0
MHUMG1_6751	0
MHUMG1_5651	0
MHUMG1_2651	0
MHUMG1_5841	0
MHUMG1_2678	0
MHUMG1_5703	0
MHUMG1_9977	0
MHUMG1_6481	0
MHUMG1_7483	0
MHUMG1_3144	0
MHUMG1_3508	0
MHUMG1_3947	0
MHUMG1_6605	0
MHUMG1_7805	0
MHUMG1_9522	0
MHUMG1_1759	0
MHUMG1_2643	0
MHUMG1_3162	0
MHUMG1_4475	0
MHUMG1_5501	0
MHUMG1_6105	0
MHUMG1_7298	0
MHUMG1_9593	0
MHUMG1_9633	0
MHUMG1_10300	0
MHUMG1_5738	0
MHUMG1_5871	0
MHUMG1_9357	0
MHUMG1_10532	0
MHUMG1_5719	0
MHUMG1_5976	0
MHUMG1_7510	0
MHUMG1_9144	0
MHUMG1_6943	0
MHUMG1_7939	0
MHUMG1_1704	0
MHUMG1_1468	0
MHUMG1_3892	0
MHUMG1_8968	0
MHUMG1_10013	0
MHUMG1_8768	0
MHUMG1_9247	0
MHUMG1_7535	0
MHUMG1_1846	0
MHUMG1_8061	0
MHUMG1_9354	0
MHUMG1_1899	0
MHUMG1_5063	0
MHUMG1_643	0
MHUMG1_2356	0
MHUMG1_2846	0
MHUMG1_5076	0
MHUMG1_8736	0
MHUMG1_7135	0
MHUMG1_2832	0
MHUMG1_1206	0
MHUMG1_4393	0
MHUMG1_2667	0
MHUMG1_4206	0
MHUMG1_7832	0
MHUMG1_939	0
MHUMG1_7335	0
MHUMG1_8532	0
MHUMG1_4417	0
MHUMG1_7194	0
MHUMG1_1869	0
MHUMG1_1139	0
MHUMG1_5204	0
MHUMG1_9355	0
MHUMG1_3115	0
MHUMG1_8552	0
MHUMG1_9662	0
MHUMG1_9865	0
MHUMG1_9881	0
MHUMG1_9904	0
MHUMG1_3550	0
MHUMG1_8785	0
MHUMG1_1080	0
MHUMG1_7441	0
MHUMG1_2787	0
MHUMG1_723	0
MHUMG1_7138	0
MHUMG1_3844	0
MHUMG1_2916	0
MHUMG1_2107	0
MHUMG1_5790	0
MHUMG1_8387	0
MHUMG1_10132	0
MHUMG1_1101	0
MHUMG1_1864	0
MHUMG1_2531	0
MHUMG1_2617	0
MHUMG1_5388	0
MHUMG1_557	0
MHUMG1_6954	0
MHUMG1_7983	0
MHUMG1_8542	0
MHUMG1_9316	0
MHUMG1_9891	0
MHUMG1_1896	0
MHUMG1_2534	0
MHUMG1_1031	0
MHUMG1_8616	0
MHUMG1_533	0
MHUMG1_10546	0
MHUMG1_9457	0
MHUMG1_10581	0
MHUMG1_10475	0
MHUMG1_7474	0
MHUMG1_9367	0
MHUMG1_10218	0
MHUMG1_7525	0
MHUMG1_9046	0
MHUMG1_9688	0
MHUMG1_2906	0
MHUMG1_3696	0
MHUMG1_4810	0
MHUMG1_646	0
MHUMG1_3726	0
MHUMG1_4129	0
MHUMG1_10543	0
MHUMG1_1753	0
MHUMG1_8679	0
MHUMG1_7501	0
MHUMG1_9767	0
MHUMG1_5847	0
MHUMG1_3272	0
MHUMG1_9515	0
MHUMG1_7623	0
MHUMG1_3342	0
MHUMG1_6936	0
MHUMG1_8414	0
MHUMG1_3658	0
MHUMG1_4416	0
MHUMG1_2854	0
MHUMG1_10007	0
MHUMG1_10015	0
MHUMG1_10026	0
MHUMG1_10032	0
MHUMG1_10038	0
MHUMG1_10113	0
MHUMG1_10134	0
MHUMG1_10147	0
MHUMG1_10186	0
MHUMG1_10210	0
MHUMG1_1022	0
MHUMG1_10293	0
MHUMG1_10297	0
MHUMG1_10298	0
MHUMG1_10299	0
MHUMG1_10331	0
MHUMG1_10348	0
MHUMG1_10377	0
MHUMG1_10399	0
MHUMG1_10400	0
MHUMG1_10412	0
MHUMG1_10425	0
MHUMG1_10453	0
MHUMG1_10491	0
MHUMG1_10507	0
MHUMG1_10523	0
MHUMG1_10525	0
MHUMG1_10565	0
MHUMG1_10571	0
MHUMG1_10585	0
MHUMG1_1146	0
MHUMG1_1175	0
MHUMG1_1237	0
MHUMG1_1244	0
MHUMG1_1314	0
MHUMG1_1327	0
MHUMG1_1385	0
MHUMG1_1389	0
MHUMG1_1415	0
MHUMG1_1416	0
MHUMG1_1432	0
MHUMG1_1448	0
MHUMG1_1474	0
MHUMG1_1485	0
MHUMG1_1751	0
MHUMG1_1784	0
MHUMG1_1791	0
MHUMG1_1811	0
MHUMG1_1817	0
MHUMG1_1872	0
MHUMG1_2180	0
MHUMG1_2181	0
MHUMG1_2193	0
MHUMG1_2197	0
MHUMG1_2257	0
MHUMG1_2262	0
MHUMG1_2271	0
MHUMG1_2281	0
MHUMG1_2312	0
MHUMG1_2332	0
MHUMG1_2335	0
MHUMG1_2344	0
MHUMG1_2369	0
MHUMG1_2547	0
MHUMG1_2583	0
MHUMG1_2585	0
MHUMG1_2647	0
MHUMG1_2674	0
MHUMG1_2675	0
MHUMG1_2683	0
MHUMG1_2699	0
MHUMG1_2751	0
MHUMG1_2861	0
MHUMG1_2891	0
MHUMG1_2908	0
MHUMG1_2985	0
MHUMG1_3127	0
MHUMG1_3175	0
MHUMG1_3243	0
MHUMG1_3292	0
MHUMG1_3551	0
MHUMG1_3607	0
MHUMG1_3671	0
MHUMG1_3701	0
MHUMG1_3713	0
MHUMG1_3744	0
MHUMG1_3761	0
MHUMG1_3820	0
MHUMG1_3824	0
MHUMG1_3832	0
MHUMG1_3854	0
MHUMG1_4019	0
MHUMG1_4022	0
MHUMG1_4064	0
MHUMG1_4133	0
MHUMG1_4211	0
MHUMG1_4215	0
MHUMG1_4266	0
MHUMG1_4268	0
MHUMG1_4271	0
MHUMG1_4283	0
MHUMG1_4366	0
MHUMG1_4413	0
MHUMG1_4454	0
MHUMG1_4494	0
MHUMG1_4496	0
MHUMG1_4536	0
MHUMG1_4542	0
MHUMG1_4553	0
MHUMG1_4595	0
MHUMG1_4717	0
MHUMG1_4741	0
MHUMG1_4775	0
MHUMG1_4809	0
MHUMG1_4834	0
MHUMG1_4896	0
MHUMG1_4899	0
MHUMG1_4905	0
MHUMG1_4907	0
MHUMG1_4924	0
MHUMG1_4947	0
MHUMG1_5019	0
MHUMG1_5045	0
MHUMG1_5066	0
MHUMG1_5131	0
MHUMG1_5182	0
MHUMG1_5214	0
MHUMG1_5216	0
MHUMG1_5222	0
MHUMG1_5302	0
MHUMG1_5430	0
MHUMG1_5469	0
MHUMG1_5506	0
MHUMG1_5507	0
MHUMG1_5515	0
MHUMG1_5537	0
MHUMG1_5584	0
MHUMG1_5671	0
MHUMG1_5705	0
MHUMG1_5760	0
MHUMG1_5762	0
MHUMG1_5767	0
MHUMG1_5778	0
MHUMG1_5785	0
MHUMG1_5787	0
MHUMG1_5916	0
MHUMG1_6011	0
MHUMG1_611	0
MHUMG1_6140	0
MHUMG1_6169	0
MHUMG1_620	0
MHUMG1_6310	0
MHUMG1_6361	0
MHUMG1_6362	0
MHUMG1_6371	0
MHUMG1_6372	0
MHUMG1_638	0
MHUMG1_6421	0
MHUMG1_6423	0
MHUMG1_6471	0
MHUMG1_6486	0
MHUMG1_6528	0
MHUMG1_6553	0
MHUMG1_6563	0
MHUMG1_6643	0
MHUMG1_6648	0
MHUMG1_6700	0
MHUMG1_6821	0
MHUMG1_6843	0
MHUMG1_7011	0
MHUMG1_7231	0
MHUMG1_7368	0
MHUMG1_7390	0
MHUMG1_7428	0
MHUMG1_7444	0
MHUMG1_7451	0
MHUMG1_7471	0
MHUMG1_7476	0
MHUMG1_7508	0
MHUMG1_7552	0
MHUMG1_7573	0
MHUMG1_7607	0
MHUMG1_7615	0
MHUMG1_7648	0
MHUMG1_7657	0
MHUMG1_7720	0
MHUMG1_7806	0
MHUMG1_7934	0
MHUMG1_7938	0
MHUMG1_7956	0
MHUMG1_7957	0
MHUMG1_7958	0
MHUMG1_7984	0
MHUMG1_7986	0
MHUMG1_810	0
MHUMG1_8122	0
MHUMG1_8212	0
MHUMG1_8214	0
MHUMG1_8216	0
MHUMG1_8220	0
MHUMG1_8240	0
MHUMG1_8267	0
MHUMG1_827	0
MHUMG1_8304	0
MHUMG1_8359	0
MHUMG1_8368	0
MHUMG1_8376	0
MHUMG1_8382	0
MHUMG1_8429	0
MHUMG1_8465	0
MHUMG1_8467	0
MHUMG1_8521	0
MHUMG1_8547	0
MHUMG1_8618	0
MHUMG1_8623	0
MHUMG1_8631	0
MHUMG1_8634	0
MHUMG1_8672	0
MHUMG1_8680	0
MHUMG1_8688	0
MHUMG1_8709	0
MHUMG1_8711	0
MHUMG1_8747	0
MHUMG1_8763	0
MHUMG1_8779	0
MHUMG1_8835	0
MHUMG1_8837	0
MHUMG1_8880	0
MHUMG1_8949	0
MHUMG1_8951	0
MHUMG1_8970	0
MHUMG1_8971	0
MHUMG1_8997	0
MHUMG1_9016	0
MHUMG1_9023	0
MHUMG1_9079	0
MHUMG1_9103	0
MHUMG1_9227	0
MHUMG1_926	0
MHUMG1_9274	0
MHUMG1_9340	0
MHUMG1_9356	0
MHUMG1_9386	0
MHUMG1_9402	0
MHUMG1_9451	0
MHUMG1_9524	0
MHUMG1_9528	0
MHUMG1_9537	0
MHUMG1_9569	0
MHUMG1_9609	0
MHUMG1_9624	0
MHUMG1_9636	0
MHUMG1_9652	0
MHUMG1_9653	0
MHUMG1_9660	0
MHUMG1_9675	0
MHUMG1_9697	0
MHUMG1_9698	0
MHUMG1_9731	0
MHUMG1_975	0
MHUMG1_9770	0
MHUMG1_9781	0
MHUMG1_9819	0
MHUMG1_9832	0
MHUMG1_9834	0
MHUMG1_9845	0
MHUMG1_9850	0
MHUMG1_9860	0
MHUMG1_9879	0
MHUMG1_9893	0
MHUMG1_993	0
MHUMG1_9973	0
MHUMG1_9982	0
MHUMG1_9983	0
